# Supplementary material for: Chicken LEAP2 Level Substantially Changes with Feed Intake and May Be Regulated by CDX4 in Small Intestine
Source: Animals (Basel). 2022 Dec 11;12(24):3496. doi: 10.3390/ani12243496 (PMC9774203; doi:10.3390/ani12243496)
Supplement: Supplementary file 1 [file animals-12-03496-s001.zip › Figure S1.pdf]

-1050 AGTGCAAAAT AAAGACCGGT TTTGATTCTT CCTCACAGGG AAGCAAGACA **SP1 (-1000/-984)**  
**SP1 (-999/-983)** AGTGGGAAA TGTAAGAGGA ACCCCAGGAA AGGAACAAAT CTTCCAGCAG TGGGTTGGAA  
 -930 GCAAAAGGGT TTTTGCTGCA AATTTGGGCT TCACAGTAAT CATCTGTAGG CTGAAACCTG  
 -870 ACAACATAGC AGGCATTATC TTAATCTATG TAACTTGCCT TCCACGCTGG CACTTATGCC  
 -810 TCCATATTAA GCAATCACAG AAAACTGTAG CCTATTGCAT TCACATCTGG ATTTACAATG  
 -750 TAGCTAAAGC ACAATTATTT **CTCF (-731/-719)** CATGCAGTAC CTGACTACTT GAAATATATA TTTTTTAAAC  
 -690 AGACTGCTTC AAAATCTCCA TGTAGAACCC GACACAATA CATCGGTATT CTGTTACTCT  
 -630 GCAACTGAAA AAATCATTTT CTTGACAGAT AAAACATAGT TGGACATTCG TGGCAGCTGG  
 -570 ATGTATAAAA TATCACAGAC AAAAAGGAGG AGATACTGAC AAGGTGCACT TACAGAGCAG  
 -510 TAATCTTAGG AACACACTAC TCCTACTTGT CTCAGTGGGA GACAAGTGGG AGAAGCATGT  
 -450 CTCAACTTTG GTATTTTGGG AAAAATGAGA GGCAGCATGT AGTCCTTTTC AACATTATTT  
 -390 TTCTCCAGGC TGTGGCAAC CTCAAATCAC CACAGAAAAG TTTAAGATTC CTCTTAATTA  
 -330 CAGTCTGCCT GTCCACATCA GTGGGAGTTT **HNF3α (-300/-292)** TGTTGGCAC TTTCAGAAGA TTGCTCATGA  
**HNF3α (-269/-262)** GTACACTGT GAGACACAGA GGCAAACTAC AGCAGAGAGC GTTCATCCCA ATACACCAGT  
 -270 GTACACTGT GAGACACAGA GGCAAACTAC AGCAGAGAGC GTTCATCCCA ATACACCAGT  
 -210 CTTGCTGCAT GGAGCAACCC ACCTCCACAA AATCCTTGCA ACCATCTCTT CCACTTTTGT  
 -150 GCTTTGCTAC CTAGAGATTA ACTGCGCATG AGGATCCTTC AAAGAACAGA TCTGTGATTT  
 -90 ACCTATCAAG TATTAACGTC ATT **CDX2 (-65/-57)** TTTACAT TCCAAACCCC ACACGGAAAA TATTACATCT  
 -30 GATTCTCAAG TGCTACTTGG TGGAAAGAAA **TSS** GGTTAAATGA CTTGCTTGTG ACTCTTTCAC

**Figure S1.** Prediction of transcription factors in the promoter region of chicken *LEAP2*.
