# Supplementary material for: Chicken LEAP2 Level Substantially Changes with Feed Intake and May Be Regulated by CDX4 in Small Intestine
Source: Animals (Basel). 2022 Dec 11;12(24):3496. doi: 10.3390/ani12243496 (PMC9774203; doi:10.3390/ani12243496)
Supplement: Supplementary file 1 [file animals-12-03496-s001.zip › Table S1-S2.xlsx]

## Sheet: Table S1
	Table S1. Primers used for the construction of pGL3-pro-LEAP2 and pGL3-pro-LEAP2-M vectors
	Primer names	Primer sequence (5'-3')	Size	Anneal temperature (℃)
	pGL3-LEAP2-F	GGggtaccGAACAAATCTTCCAGCAGTG	1822bp	60℃
	pGL3-pro-LEAP2-R	CCCaagcttAGATGTAATATTTTCCGTGT
	pGL3-pro-LEAP2-M-R	CCCaagcttAGATGTAATATTTTCCGTGTGGGGTTTGACACAGCAAA
	Note：Lower case letters indicate the digestion sequence

## Sheet: Table S2
	Table S2. Primers used for the construction of pcDNA3.1-CDX4 vector
	Primer names	Primer sequence (5'-3')	Size	Anneal temperature (℃)
	Big-CDX4-F	CAAGCAGTTTGGCACTATTA	1822bp	55℃
	Big-CDX4-R	TCTGTGAGCATGTTTATCCC
	pcDNA3.1-CDX4-F	GGggtaccGCCACCATGTATGTGAGCTCTCTCTTG	1035bp	58℃
	pcDNA3.1-CDX4-R	CCGgaattcTTTGAGTGATGAGTATTAGCAG
	Note：Lower case letters indicate the digestion sequence
